# Supplementary material
Source: PubMed Central journal article supplement (PMC2427288)
Supplement: mmc1.pdf [file mmc1.pdf]

Supplemental Data

**Evolution of HIV-1 Isolates that Use  
a Novel Vif-Independent Mechanism  
to Resist Restriction by Human APOBEC3G**

Guylaine Haché, Keisuke Shindo, John S. Albin, and Reuben S. Harris

Figure S1. Haplotype of Four Families with Mutation

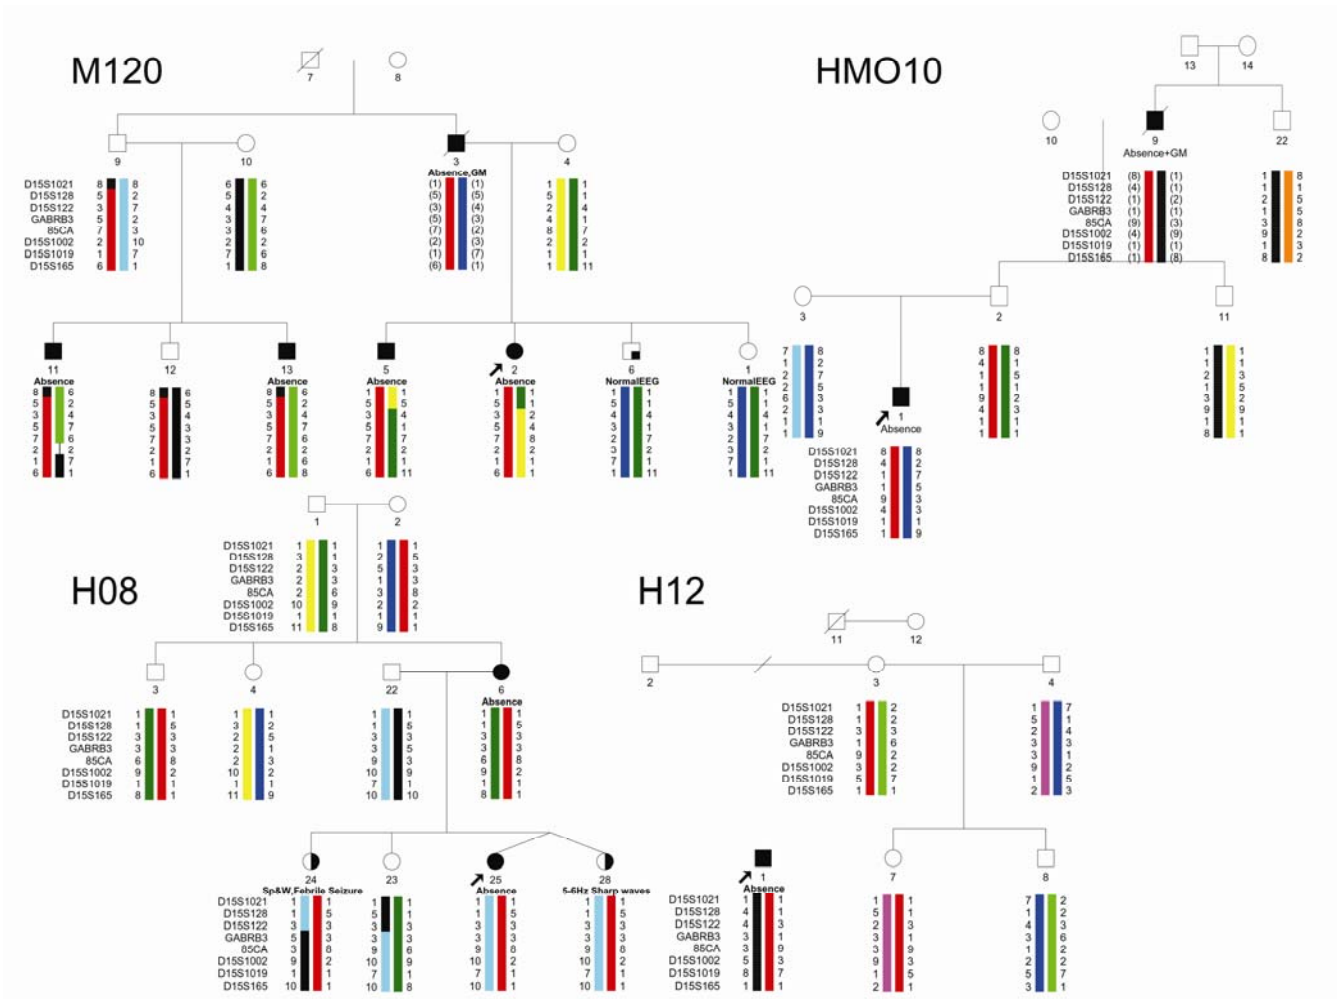

( / ) indicates deduced phenotype.
